# Supplementary figures and images for: SETDB1 targeting SESN2 regulates mitochondrial damage and oxidative stress in renal ischemia–reperfusion injury
Source: PubMed Central journal article supplement — BMC Biol. 2024 Oct 23;22:246. doi: 10.1186/s12915-024-02048-z (PMC11515507; doi:10.1186/s12915-024-02048-z), 2024-10-23

**Fig.1C**

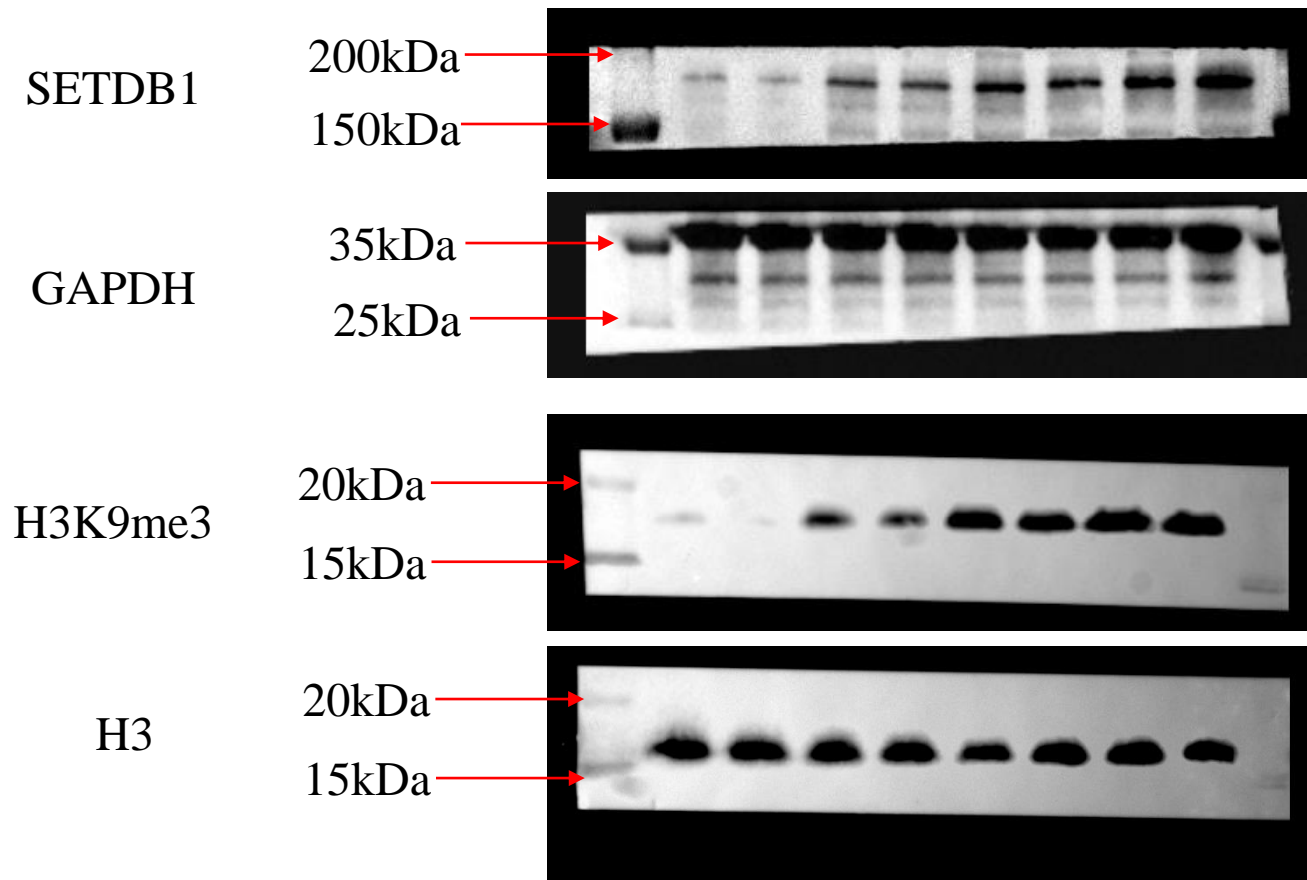

**Fig.1F**

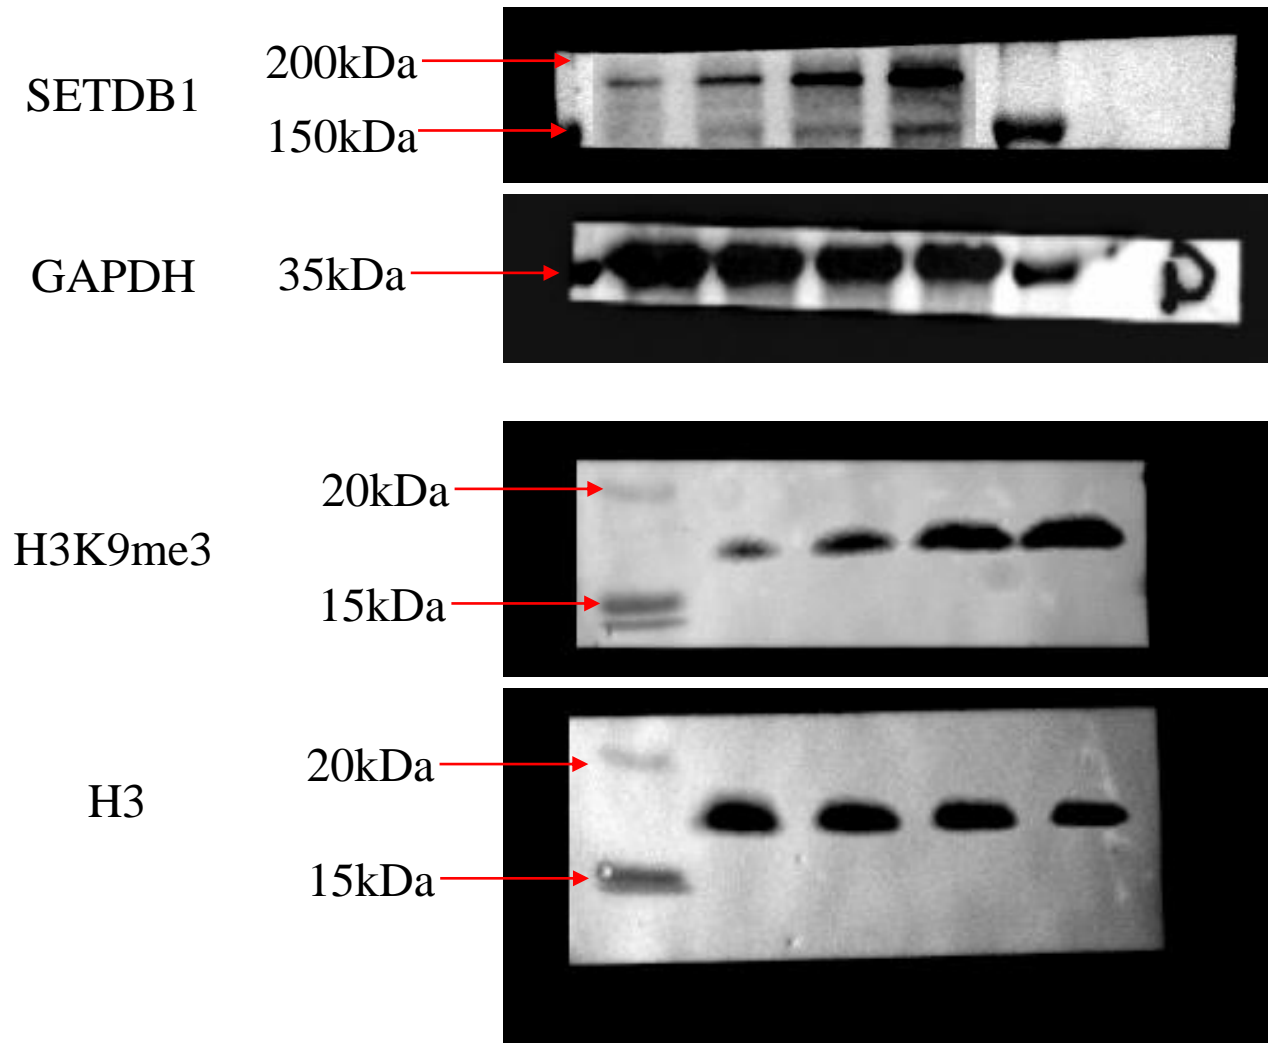

**Fig.2F**

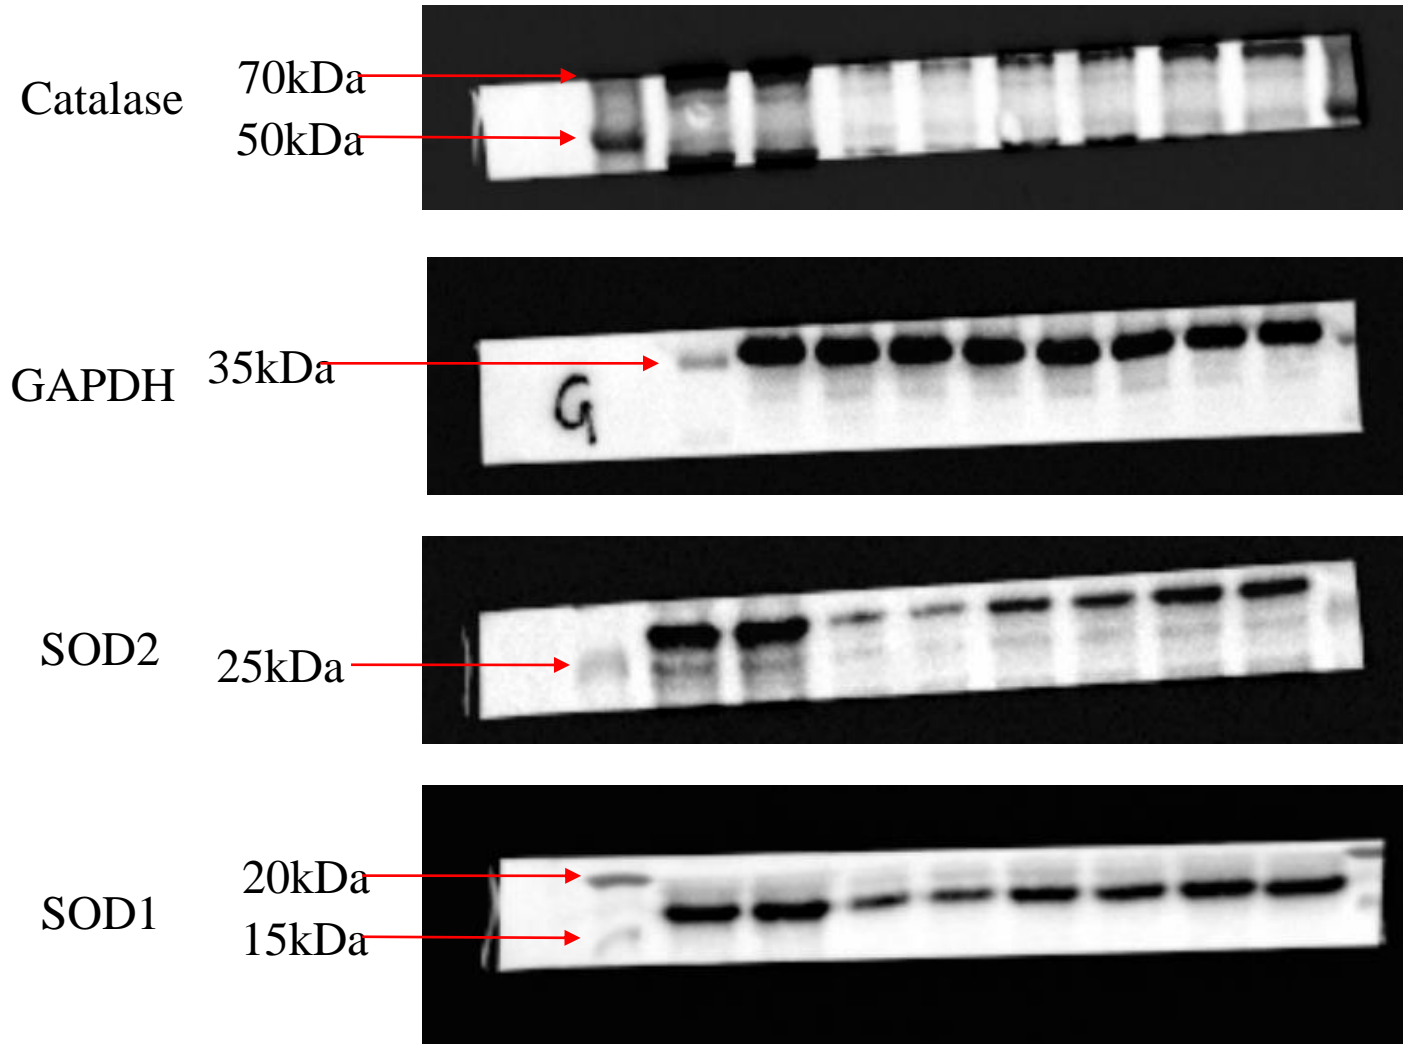

**Fig.3D**

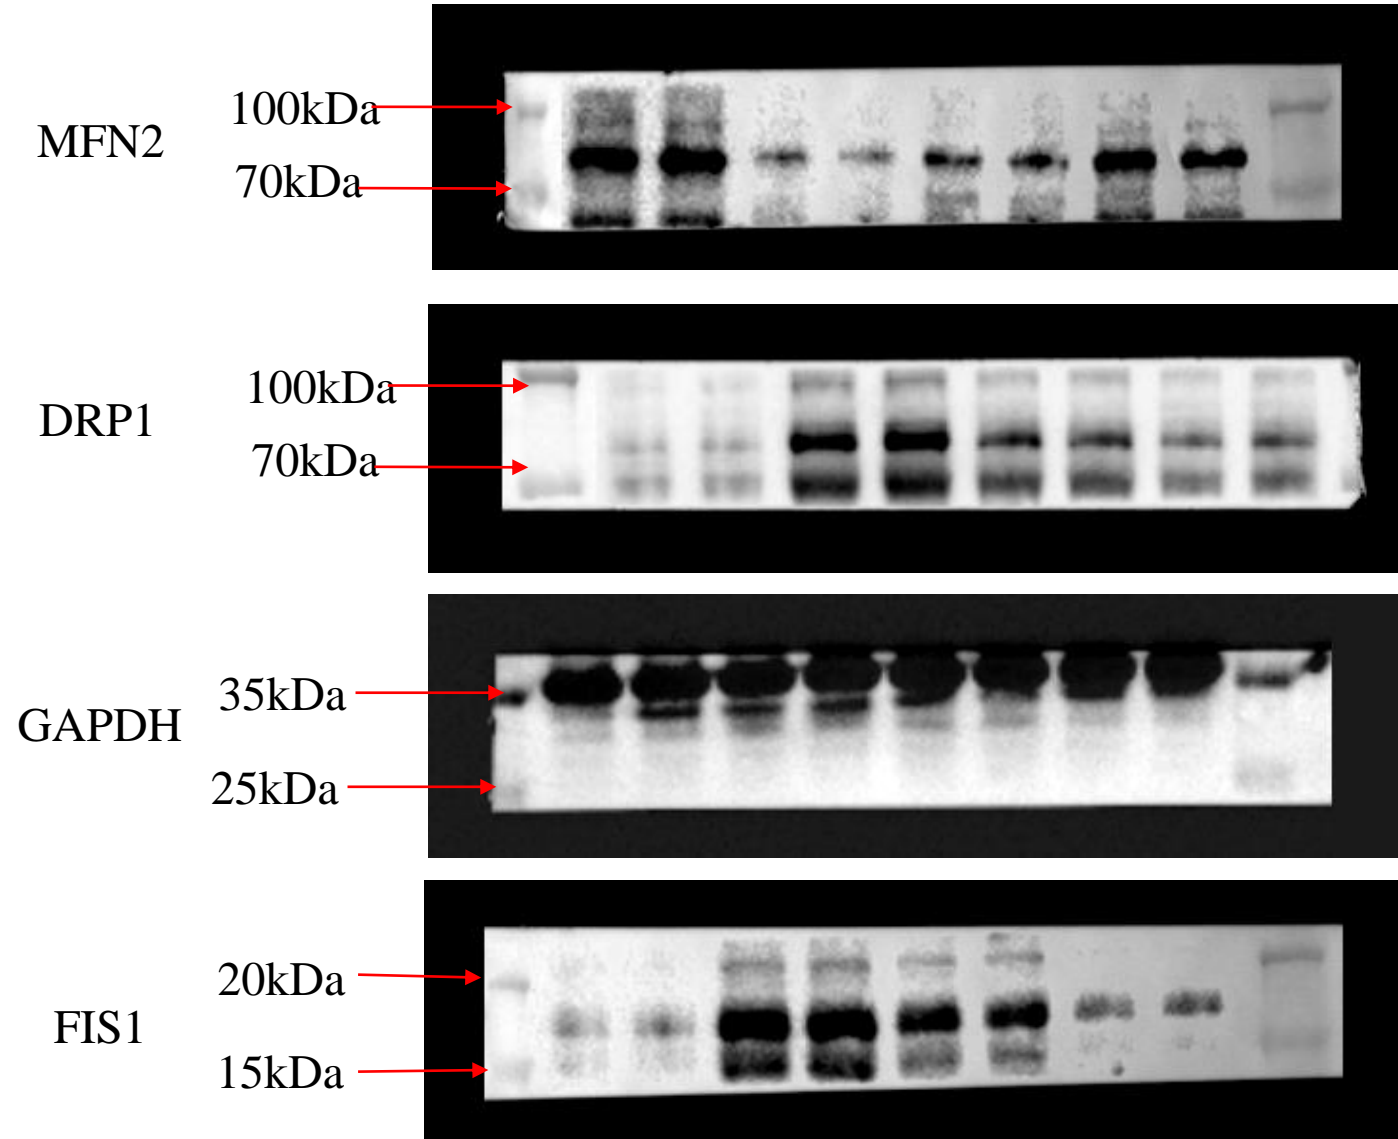

**Fig.4E**

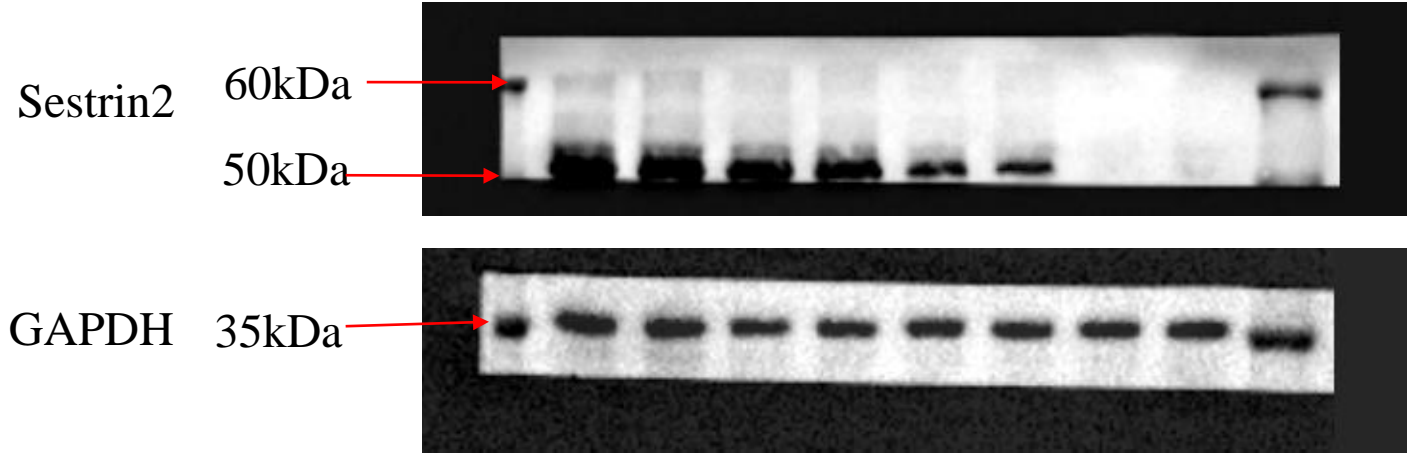

**Fig.4H**

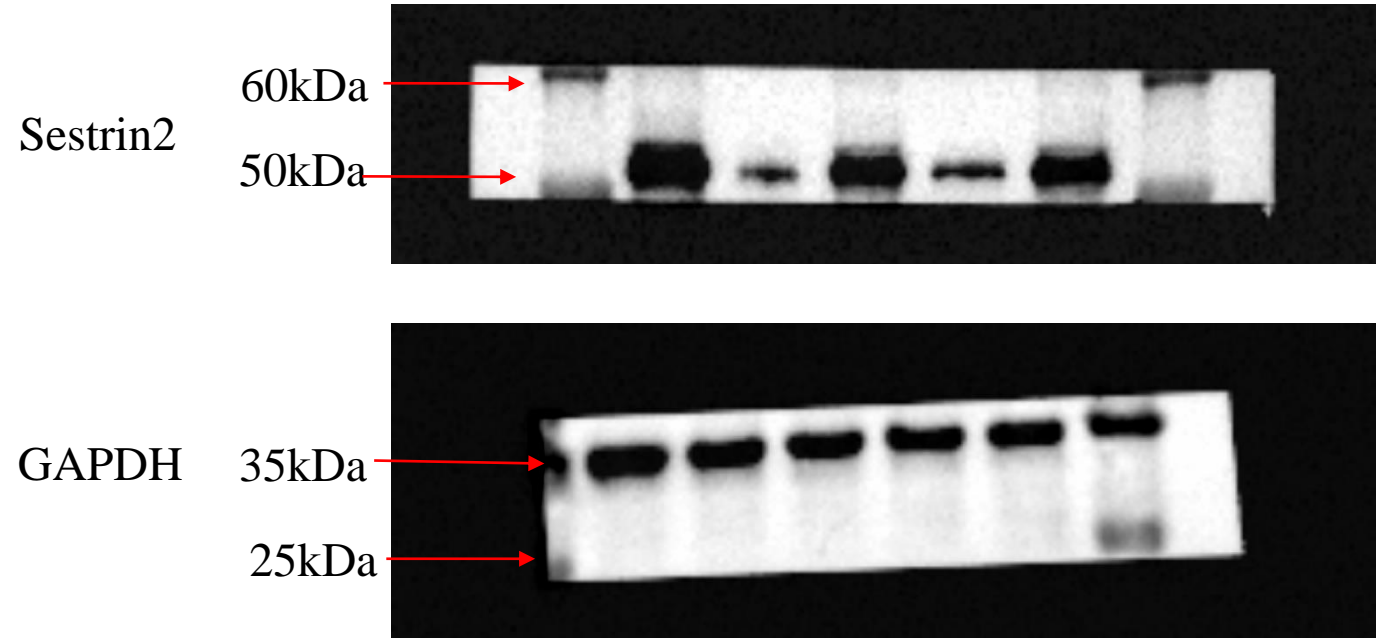

**Fig.6C**

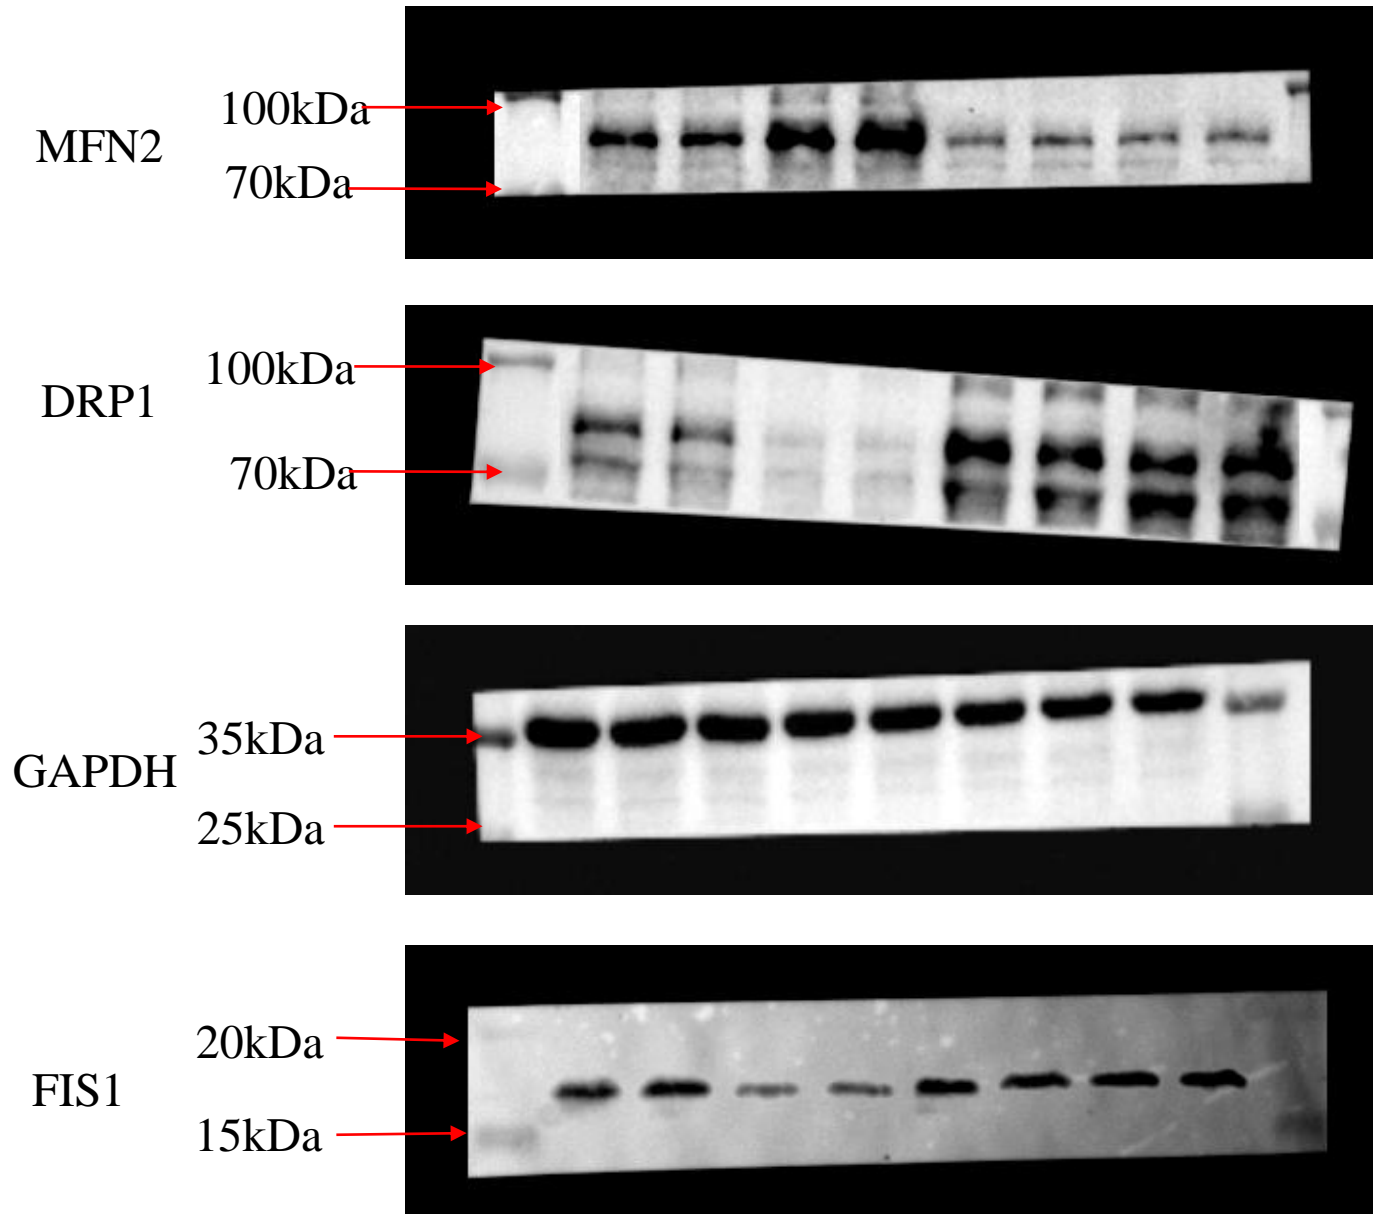

**Fig.7F**

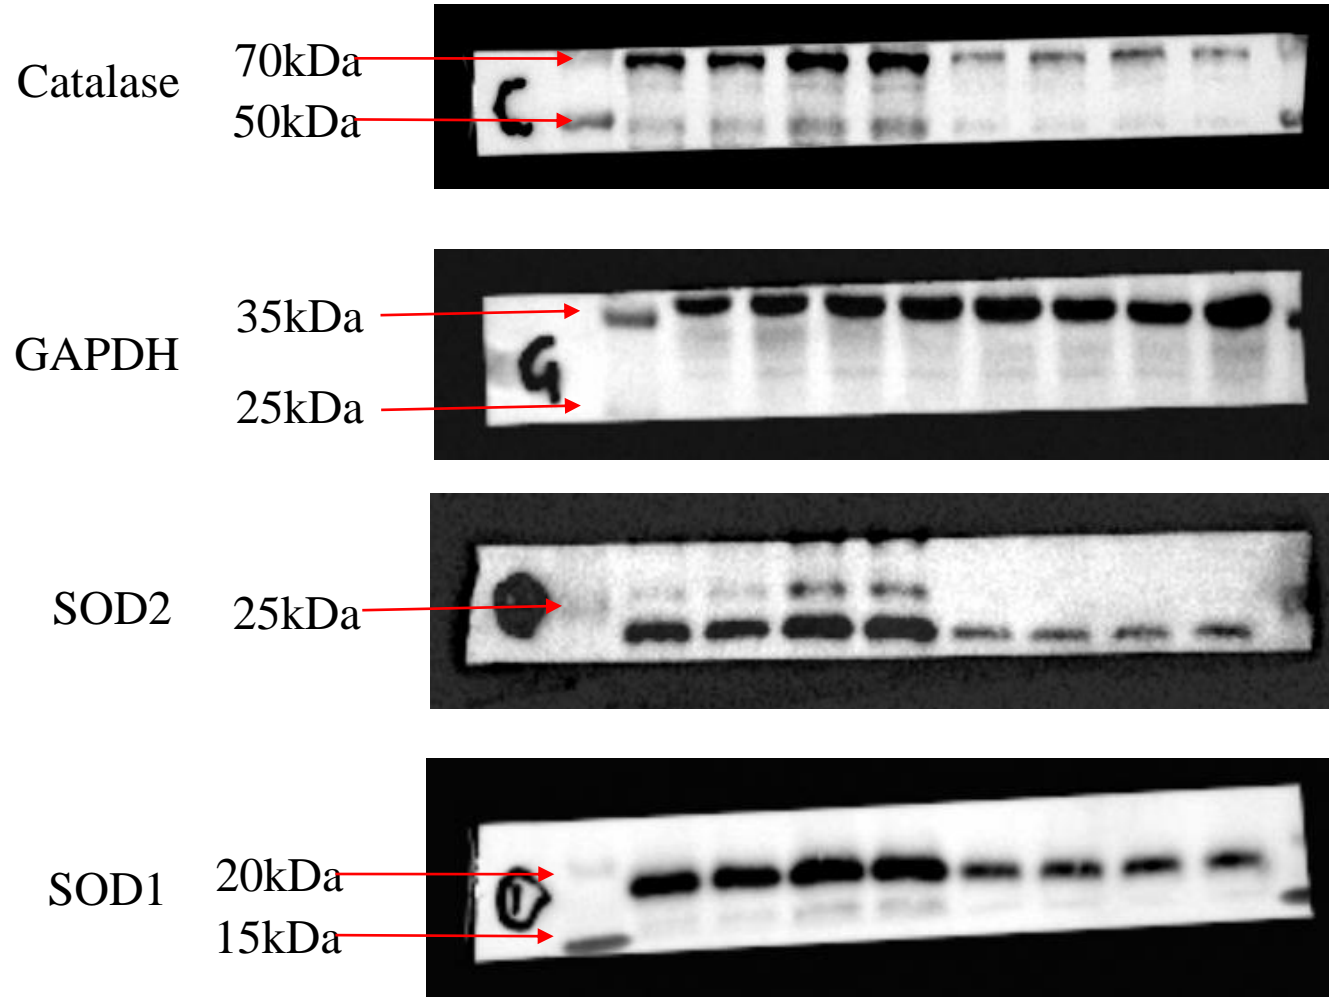

**Fig.8A**

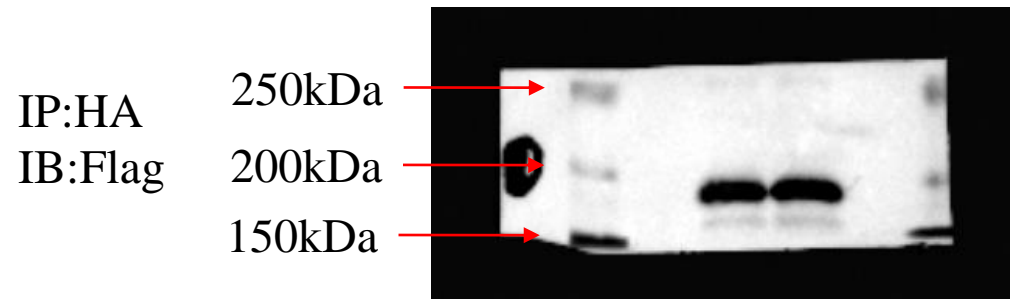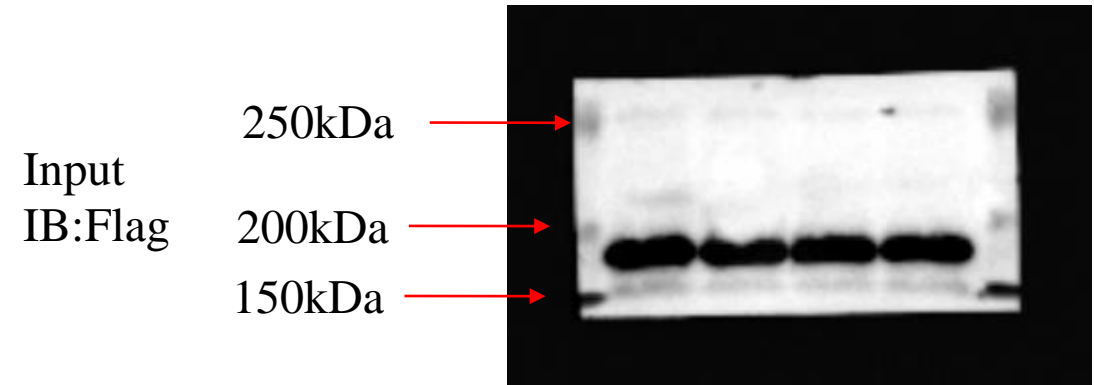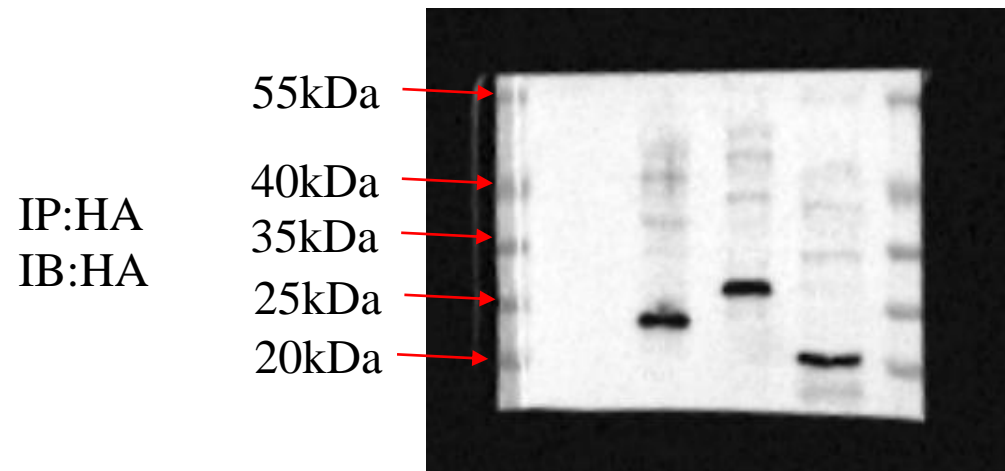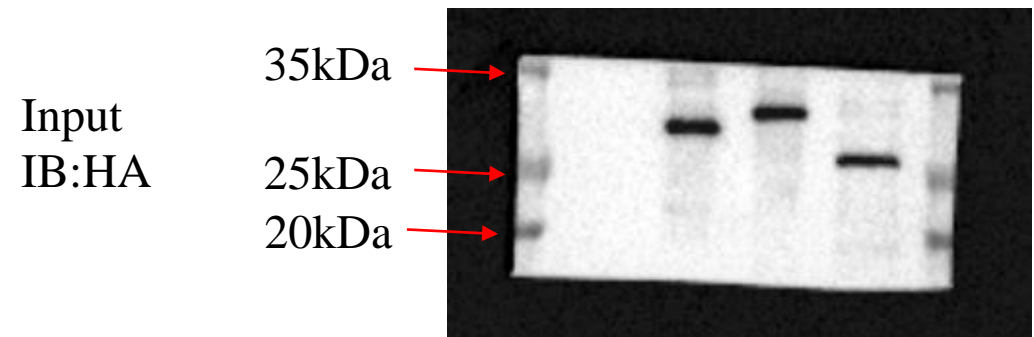



**Fig.8B**

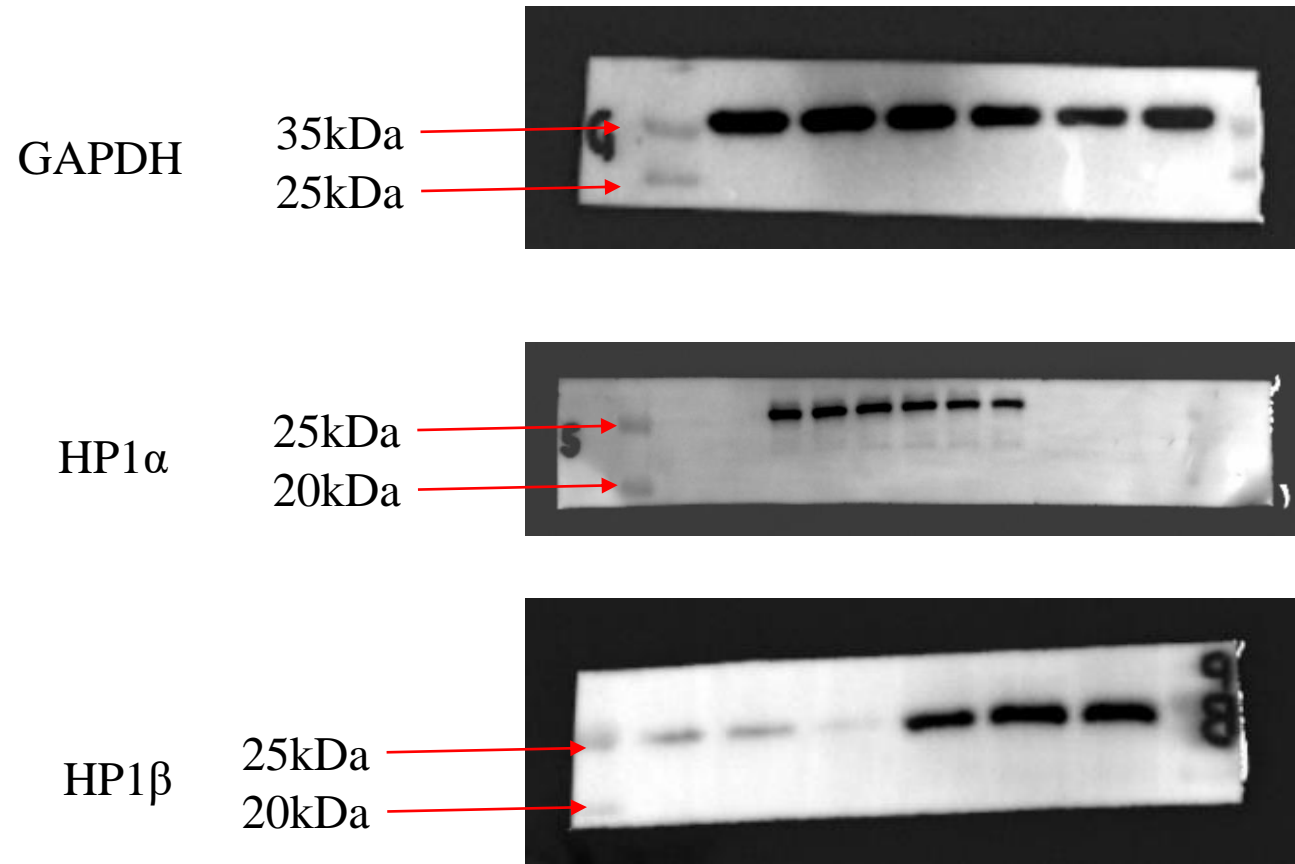

**Fig.8E**

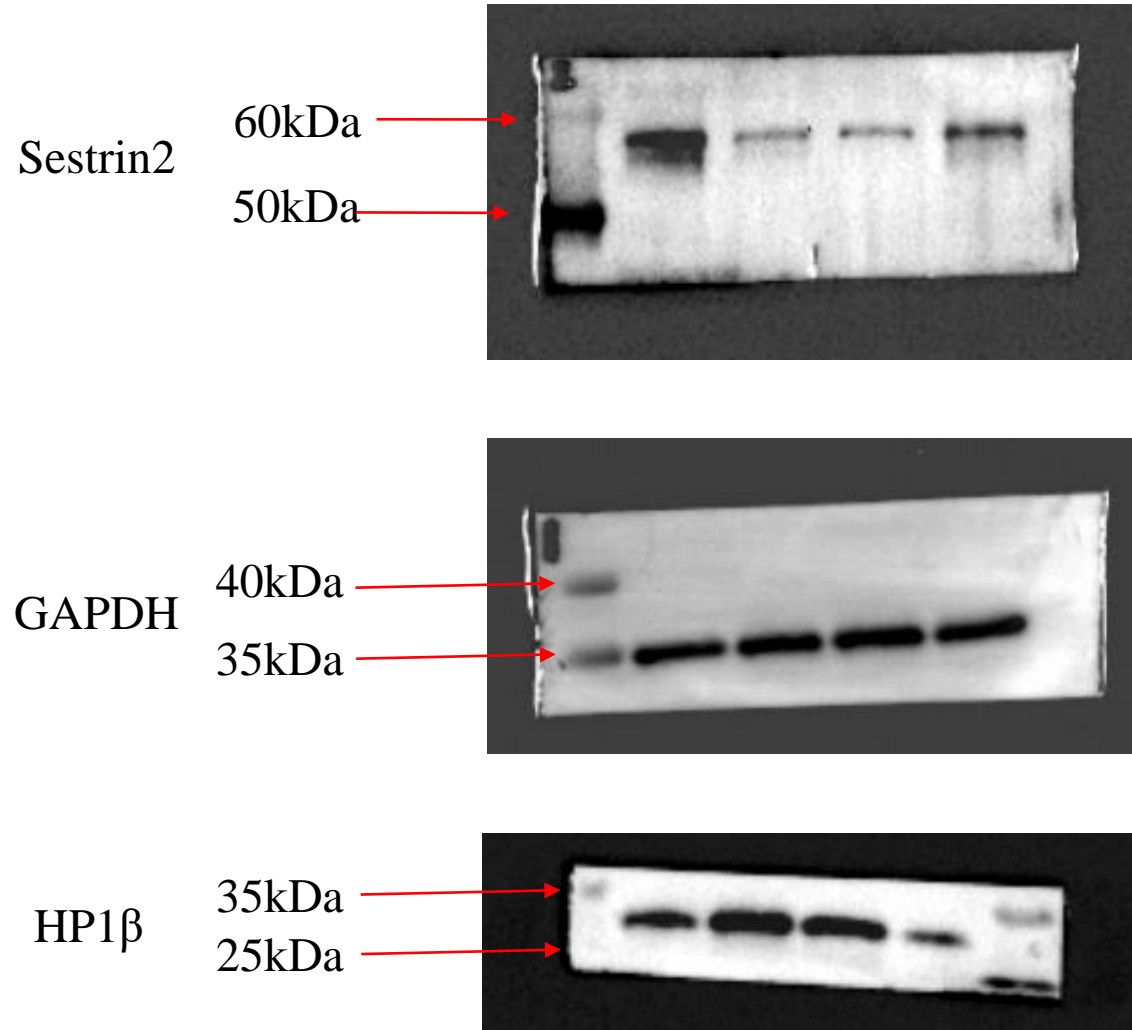

**Fig.S2A**

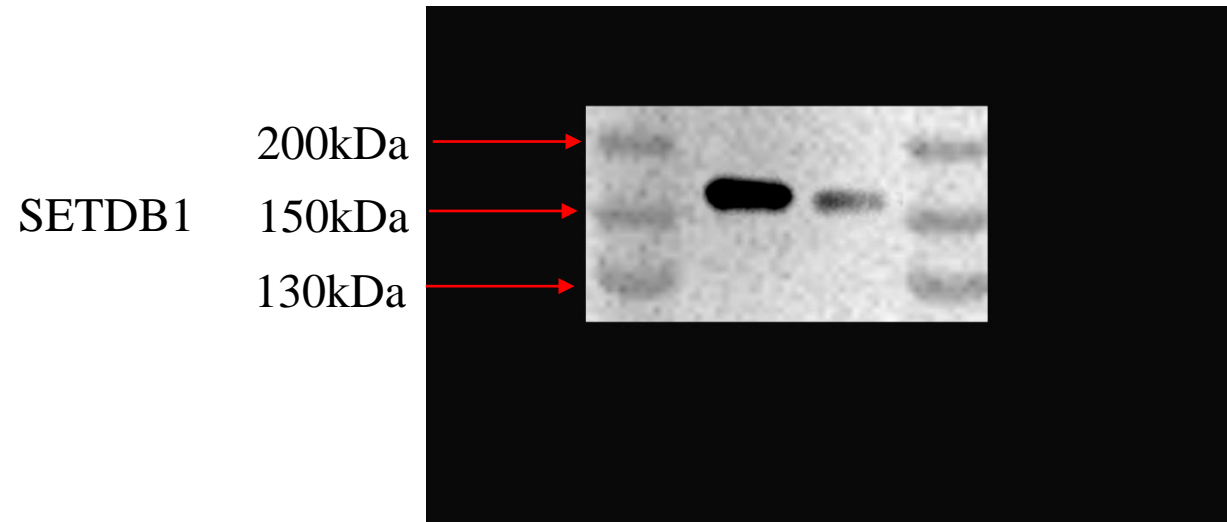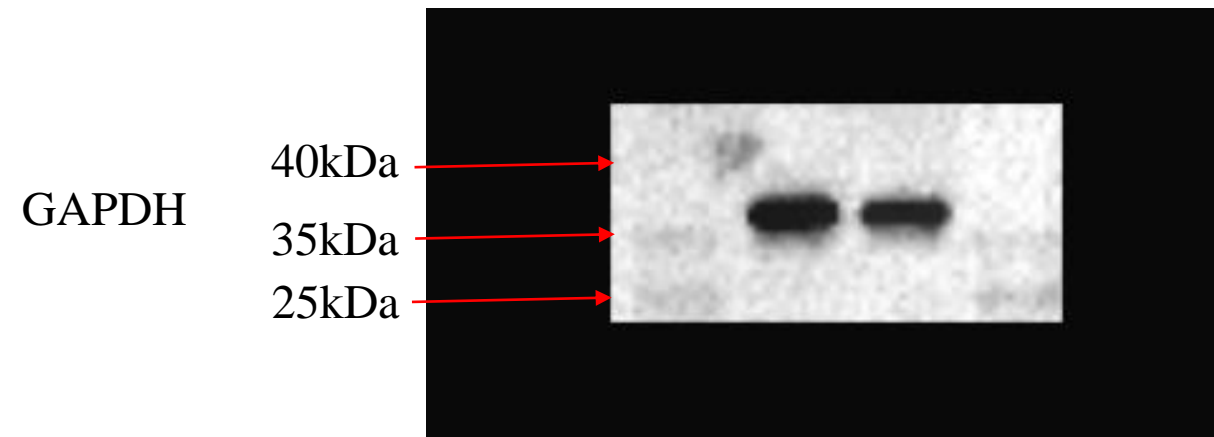

**Fig.S2B**

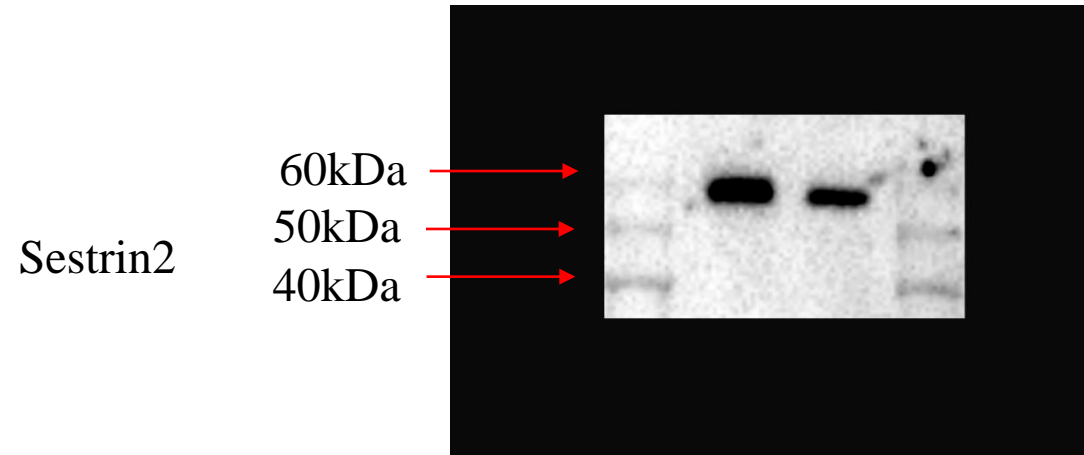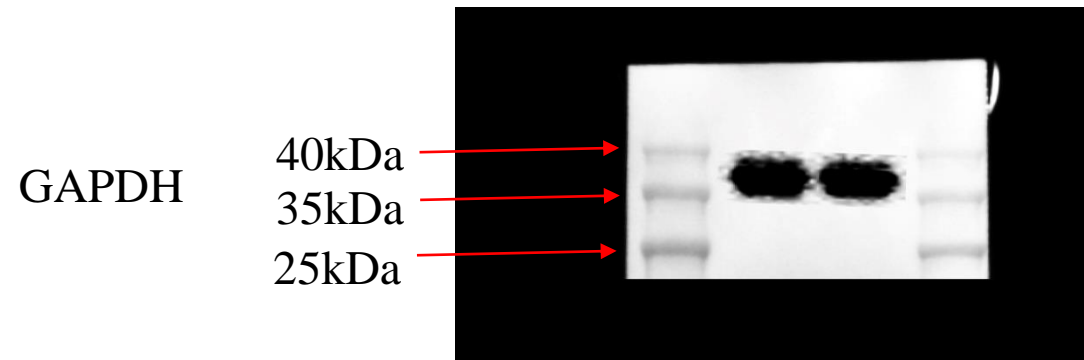

Supplement: 12915_2024_2048_MOESM2_ESM.pdf [file 12915_2024_2048_MOESM2_ESM.pdf]
